# Supplementary material for: Rapid and sensitive detection of tert-butylhydroquinone in soybean oil using a gold-based paper sensor
Source: Royal Society of Chemistry journal article supplement (doi:10.1039/d2an00265e), 2022-01-01
Supplement: d2an00265e1.pdf [file d2an00265e1.pdf]

## *Supplementary Information*

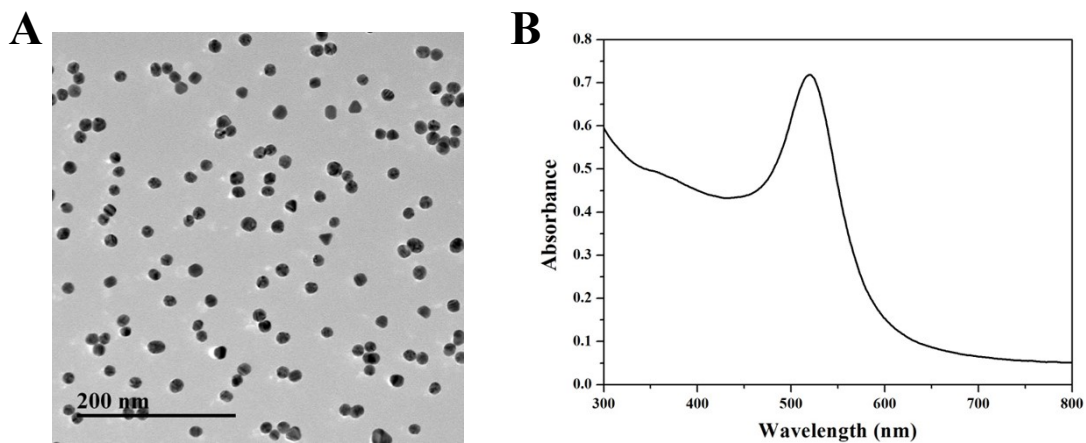

**Figure S1.** Identification of the GNP solution by TEM (A) and UV spectroscopy (B).
